# Supplementary material
Source: Springer Nature journal article supplement (https://www.springermedizin.de/resource/supplementary/13054_2013_3025_MOESM3_ESM.pdf/9712420)

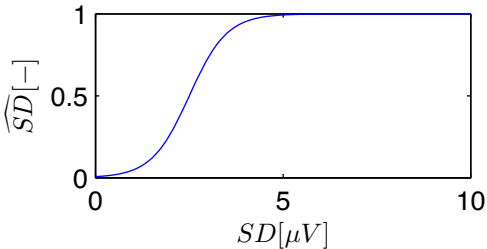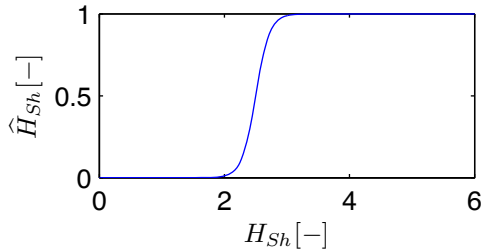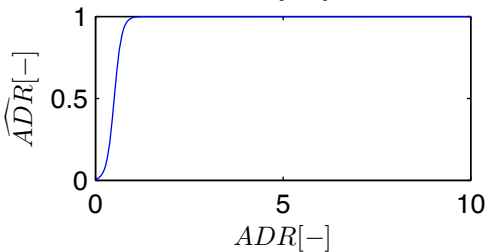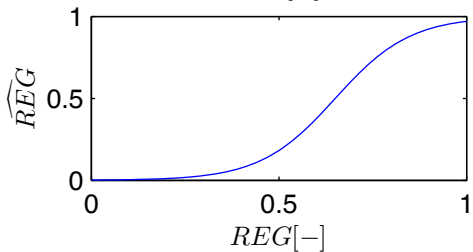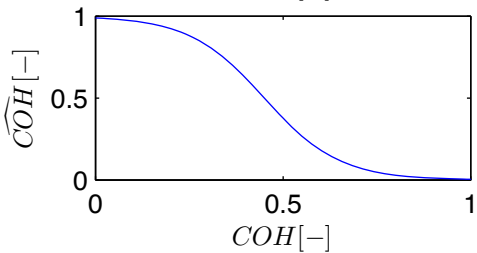

Supplement: MOESM3 [file 9712420]
